# Supplementary material for: Au depositing and Mg doping synergistically regulates an In2O3 photocatalyst for promoting CO2 reduction and CH4 exclusive generation
Source: Royal Society of Chemistry journal article supplement (doi:10.1039/d4qi01381f), 2024-01-01
Supplement: d4qi01381f1.pdf [file d4qi01381f1.pdf]

**Au depositing and Mg doping synergistically regulates In<sub>2</sub>O<sub>3</sub>  
photocatalyst for promoting CO<sub>2</sub> reduction and CH<sub>4</sub>  
exclusive generation**

Yanduo Liu<sup>a,\*</sup>, Jiadong Li<sup>b,\*</sup>, Xianglan Dong<sup>a</sup>, Lina Dai<sup>a</sup>, Enqi Zhang<sup>a</sup>

<sup>a</sup> School of Chemistry and Chemical Engineering, Harbin Normal University,

Harbin150025, Heilongjiang, China. E-mail: liuyd0608@163.com

<sup>b</sup> School of New Energy, Ningbo University of Technology, Ningbo315336, Zhejiang,

China. E-mail: lij@nbut.edu.cn

---

**\*Corresponding Authors.**

E-mail addresses: liuyd0608@163.com (Yanduo Liu), lij@nbut.edu.cn (Jiadong Li)

## **Characterization techniques**

A Bruker D8 Advance diffractometer was used to analyze the X-ray powder diffraction (XRD) using Cu K $\alpha$  radiation. A Model Shimadzu UV-2750 spectrophotometer was adopted to record the UV-vis diffuse reflectance spectrum (DRS) by using with BaSO<sub>4</sub> as a reference. Morphologies of samples were observed by using a scanning electron microscope (SEM, HitachiS-4800 instrument, Tokyo, Japan) and Transmission electron microscopy (TEM, JEOL JEM-2010EX instrument), operating at acceleration voltage of 15 kV and a 200 kV accelerating voltage, respectively. A self-built equipment was applied to detect the steady-state surface photovoltage spectroscopy (SS-SPS), equipped with a lock-in amplifier (SR830, USA) synchronized with a light chopper (SR540, USA). A Kratos-Axis Ultra DLD apparatus with an Al (mono) X-ray source was used to measure the X-ray photoelectron spectroscopy (XPS). All the XPS spectra were calibrated according to the C 1s peak at 284.8 eV. The electron paramagnetic resonance (EPR) measurements were carried out on a Bruker EMX plus model spectrometer operating at the X-band frequency. The near ambient pressure (NAP)-XPS spectra were collected at the SPECS NAP-XPS. The light irradiation was introduced into the analysis chamber through an observation window using a 300 W xenon lamp.

## **Photoelectrochemical measurement**

Using a conventional electrochemical workstation that had a standard three-electrode electro-chemical system tested the photoelectrochemical measurements (CHI760E, Shanghai). The film electrode was fabricated as follows: 50 mg of photocatalyst and 35 mL of terpineol were stirred vigorously to prepare the

experimental electrode. Then, the mixture was coated onto the FTO electrode and then calcined at 200 °C for 120 min. The working electrode, Pt plate and Ag/AgCl electrode were taken as the working electrode, the counter electrode and the reference electrode on a LK2006 A workstation, respectively. 1 M KOH solution was used as electrolyte and a 300W Xenon lamp (wavelength range: 320-780 nm, spot diameter: 60 mm, light power: 134 mW/cm<sup>2</sup>) with a 420 nm cut off filter was used as light source. Mott-Schottky tests were conducted at frequencies of 500, 1000 and 1500 Hz.

### **Hydroxyl radical amount measurement**

0.05 g of the sample was dispersed in 60 mL of  $1 \times 10^{-3}$  mol L<sup>-1</sup> aqueous solution in a quartz reactor. The suspension was stirred for 30 min before irradiation. After a given irradiation time with a spectrofluorometer (PerkinElmer LS 55), a certain amount of the solution was transferred into a Pyrex glass cell for the fluorescence measurement of 7-hydroxycoumarin with characteristic emission peak at about 460 nm under the light excitation of 332 nm.

### **Evaluation for CO<sub>2</sub> temperature programmed desorption**

CO<sub>2</sub>-temperature programmed desorption (CO<sub>2</sub>-TPD) were performed by Chemisorption Analyzer, TP 5080 Chemisorb with a thermal conductivity detector (TCD). 50 mg sample was preheated at 300 °C for 0.5 h to remove the other adsorbed gases and water and then cooled down to 30 °C under He flow rate of 30 mL min<sup>-1</sup>. The pure CO<sub>2</sub> gas was introduced at 30 °C under CO<sub>2</sub> flow rate of 50 mL min<sup>-1</sup> for 0.5 h. The excess weak physically adsorbed O<sub>2</sub> was removed by He flow rate of 30 mL min<sup>-1</sup> at 30 °C for 60 min. Then the temperature was increased to 400 °C with the heating rate of 10 °C min<sup>-1</sup> under He flow rate of 30 mL min<sup>-1</sup>.

### **In situ DRIFTS measurements**

The in situ diffuse reflectance infrared Fourier transform spectroscopy (DRIFTS)

analysis was carried out in an in situ diffuse reflectance pool with a Bruker Vector FTIR spectrometer (6700) and MCT detector which was cooled by liquid N<sub>2</sub>. Firstly, a certain amount of KBr was filled into the reaction cell, and then covered with 0.2 g catalyst. The reaction cell was placed in the test chamber and heated to 175 °C under N<sub>2</sub> flow for 30 min to remove adsorbed impurities and then cooled to room temperature. In order to simulate the photocatalytic CO<sub>2</sub> reduction process, the CO<sub>2</sub> and H<sub>2</sub>O were passed into the reaction cell. In this condition, a certain amount of CO<sub>2</sub> and H<sub>2</sub>O could be adsorbed on the surface of sample and then purged with N<sub>2</sub>. Subsequently, the sample was irradiated under visible light. A 300 W Xenon arc lamp was used as the light source.

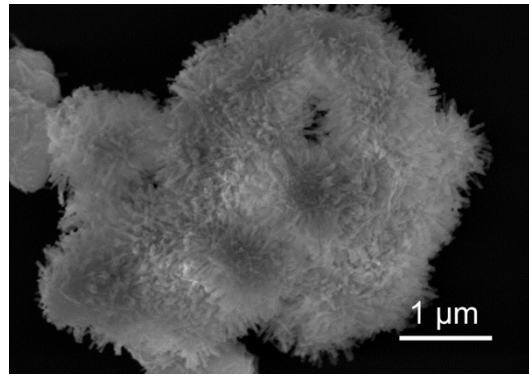

Fig. S1. TEM images of 2Mg-In<sub>2</sub>O<sub>3</sub>.

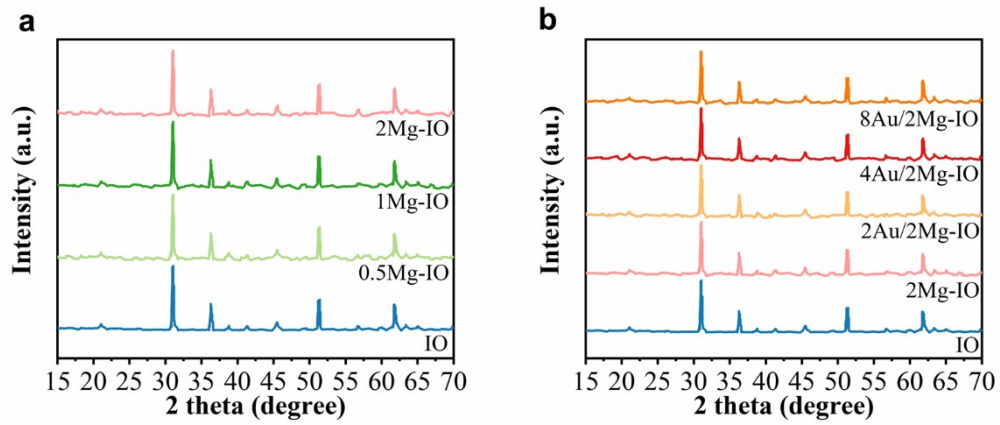

Fig. S2. XRD patterns of In<sub>2</sub>O<sub>3</sub>, xMg-In<sub>2</sub>O<sub>3</sub> and yAu/2Mg-In<sub>2</sub>O<sub>3</sub> samples.

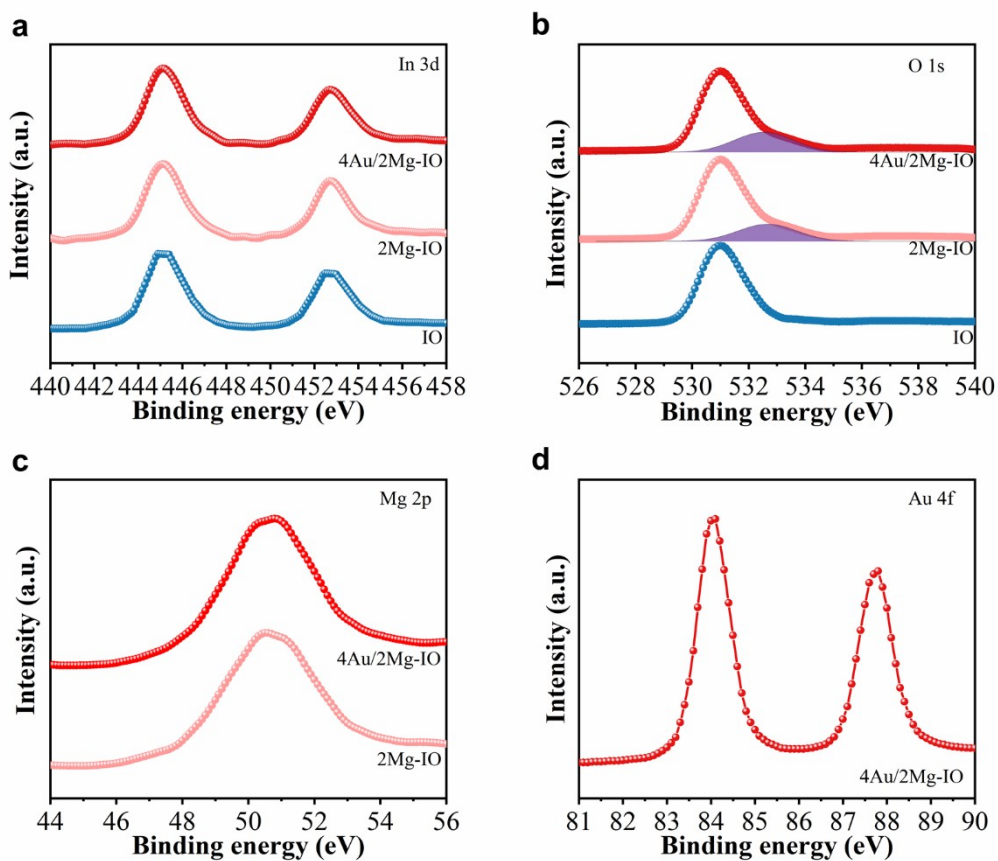

**Fig. S3.** (a) In 3d XPS spectra, (b) O 1s XPS spectra, (c) Mg 2p XPS spectra, and (d) Au 4f XPS spectra of  $\text{In}_2\text{O}_3$ ,  $2\text{Mg-In}_2\text{O}_3$  and  $4\text{Au}/2\text{Mg-In}_2\text{O}_3$  samples.

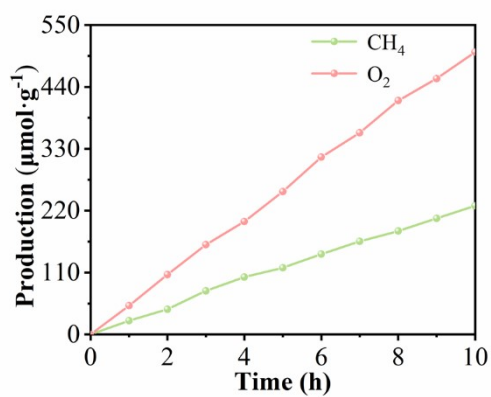

**Fig. S4.** Time-dependent photocatalytic  $\text{O}_2$  and  $\text{CH}_4$  production over  $4\text{Au}/2\text{Mg-In}_2\text{O}_3$  under light irradiation of 10 h.

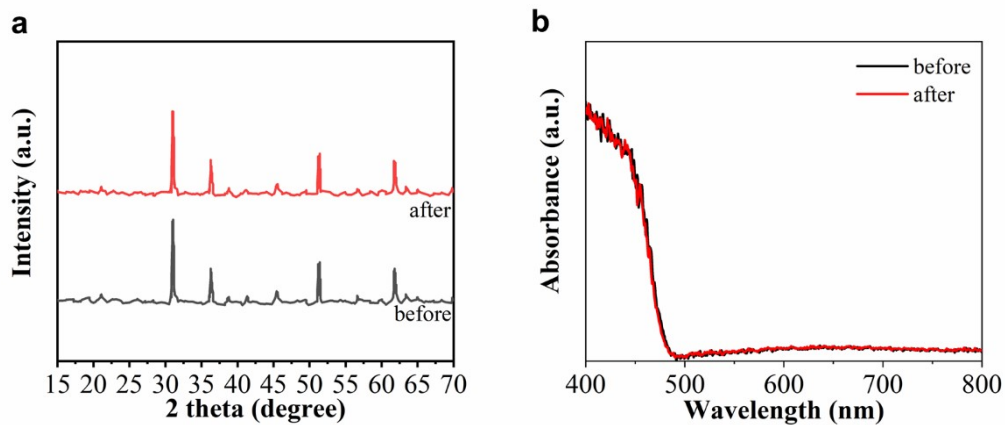

Fig. S5. (a) XRD patterns and (b) DRS spectra of 4Au/2Mg-In<sub>2</sub>O<sub>3</sub> at different stages.

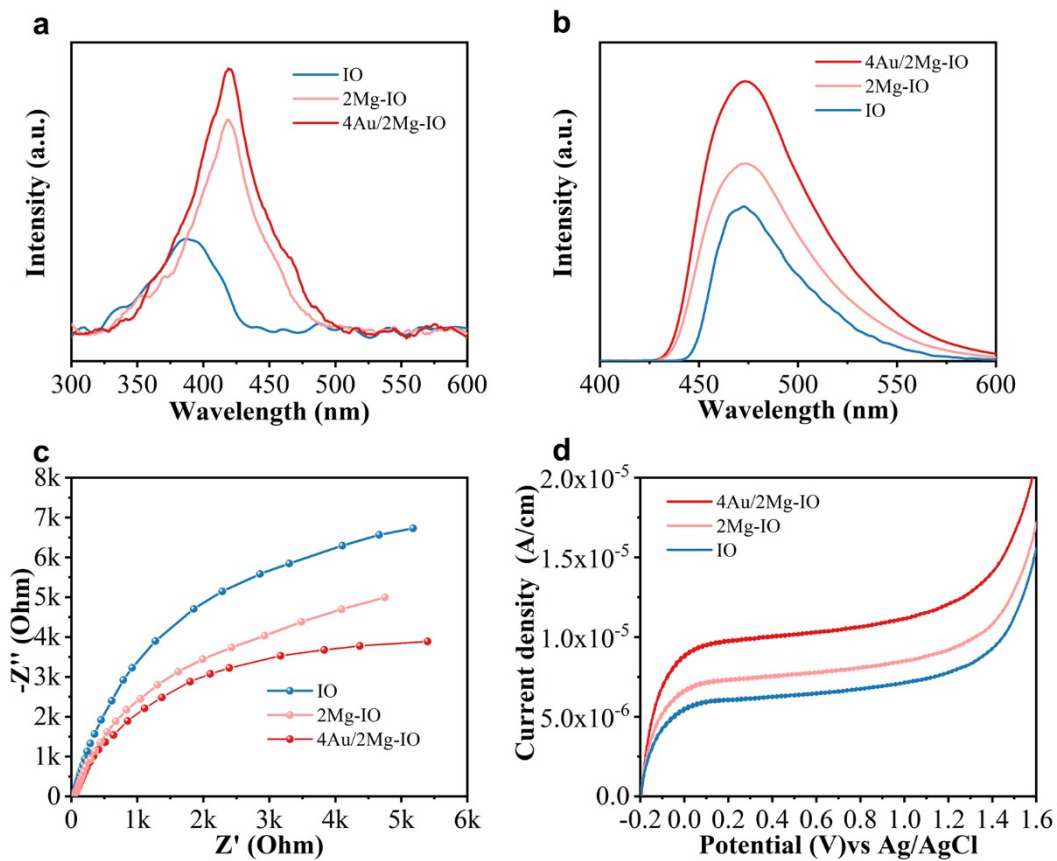

Fig. S6. (a) SS-SPS spectra, (b) Fluorescence spectra related to the formed  $\cdot\text{OH}$  amounts, (c) EIS spectra and (d) I-V curves under irradiation with UV-Vis light over In<sub>2</sub>O<sub>3</sub>, 2Mg-In<sub>2</sub>O<sub>3</sub> and 4Au/2Mg-In<sub>2</sub>O<sub>3</sub> samples.

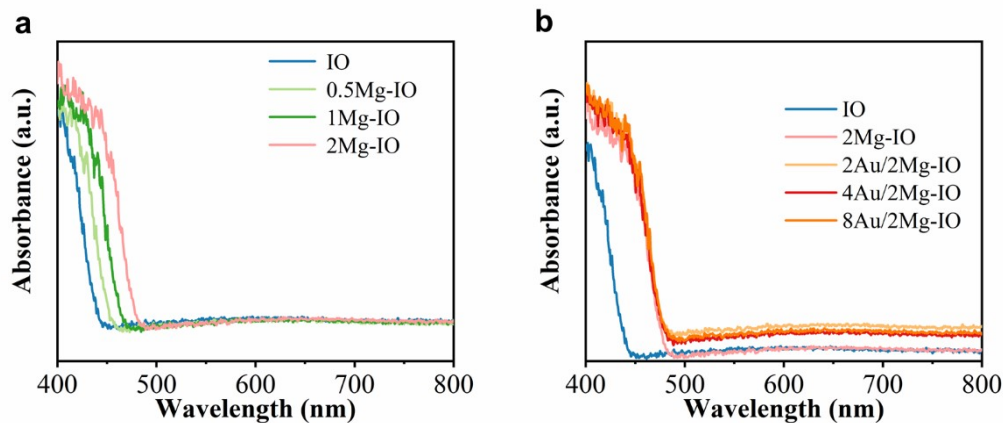

**Fig. S7.** DRS spectra of  $\text{In}_2\text{O}_3$ ,  $x\text{Mg-In}_2\text{O}_3$  and  $y\text{Au}/2\text{Mg-In}_2\text{O}_3$  samples.

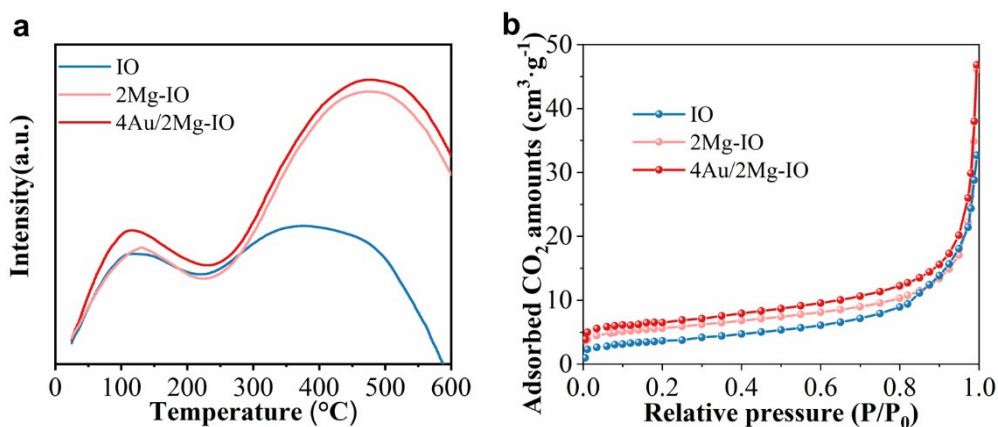

**Fig. S8.** (a)  $\text{CO}_2$ -TPD curves and (b)  $\text{CO}_2$  adsorption–desorption isotherms of  $\text{In}_2\text{O}_3$ ,  $2\text{Mg-In}_2\text{O}_3$  and  $4\text{Au}/2\text{Mg-In}_2\text{O}_3$  samples.

Table S1. Photocatalytic activity of  $\text{CO}_2$  reduction conversion over different samples.

| Catalyst                               | Rate of product ( $\mu\text{mol/g/h}$ ) |               |              | $\text{CH}_4$ selectivity (%) |
|----------------------------------------|-----------------------------------------|---------------|--------------|-------------------------------|
|                                        | CO                                      | $\text{CH}_4$ | $\text{O}_2$ |                               |
| $\text{In}_2\text{O}_3$                | 15.7                                    | 2.1           | 12.5         | 11.8                          |
| $0.5\text{Mg-In}_2\text{O}_3$          | 17.3                                    | 2             | 13.1         | 10.4                          |
| $1\text{Mg-In}_2\text{O}_3$            | 1.5                                     | 9.6           | 20.7         | 86.5                          |
| $2\text{Mg-In}_2\text{O}_3$            | 0                                       | 12.7          | 26.2         | 100                           |
| $2\text{Au}/2\text{Mg-In}_2\text{O}_3$ | 0                                       | 19.2          | 40.1         | 100                           |
| $4\text{Au}/2\text{Mg-In}_2\text{O}_3$ | 0                                       | 24.5          | 51.2         | 100                           |
| $8\text{Au}/2\text{Mg-In}_2\text{O}_3$ | 0                                       | 22.1          | 45.3         | 100                           |



Table S2. The comparison of catalytic performance with representative state-of-the-art photocatalysts for photocatalytic reduction of CO<sub>2</sub>.

| Catalysts                                                              | Production rate of CO<br>( $\mu\text{mol/g/h}$ ) | Production rate of CH <sub>4</sub><br>( $\mu\text{mol/g/h}$ ) | References |
|------------------------------------------------------------------------|--------------------------------------------------|---------------------------------------------------------------|------------|
| 4Au/2Mg-In <sub>2</sub> O <sub>3</sub>                                 | -----                                            | 24.50                                                         | this work  |
| In <sub>2</sub> O <sub>3</sub> @InP <sub>60</sub> /Cu <sub>2</sub> O-1 | 2.74                                             | 7.76                                                          | [S1]       |
| 20ZFO/10RGO/IO                                                         | 8.85                                             | 1.95                                                          | [S2]       |
| Cu-In <sub>2</sub> O <sub>3</sub> /C                                   | 43.70                                            | 15.90                                                         | [S3]       |
| H-CeO <sub>2-x</sub> @In <sub>2</sub> O <sub>3-x</sub>                 | 9.67                                             | 1.95                                                          | [S4]       |
| NH <sub>2</sub> -UiO-66/Au/In <sub>2</sub> O <sub>3</sub>              | 8.56                                             | 0.19                                                          | [S5]       |
| WO <sub>3</sub> /In <sub>2</sub> O <sub>3</sub>                        | 6.60                                             | 5.40                                                          | [S6]       |
| In <sub>2</sub> O <sub>3</sub> @TiO <sub>2</sub> -10                   | 1.50                                             | 11.10                                                         | [S7]       |

Table S3. Photocatalytic activity of CO<sub>2</sub> reduction conversion over 4Au/2Mg-In<sub>2</sub>O<sub>3</sub> for 10 h.

| Time | Rate of product ( $\mu\text{mol/g/h}$ ) |                 |                | CH <sub>4</sub> selectivity<br>(%) |
|------|-----------------------------------------|-----------------|----------------|------------------------------------|
|      | CO                                      | CH <sub>4</sub> | O <sub>2</sub> |                                    |
| 1    | 0                                       | 24.5            | 51.2           | 100                                |
| 2    | 0                                       | 44.8            | 106.4          | 100                                |
| 3    | 0                                       | 77.5            | 159.6          | 100                                |
| 4    | 0                                       | 102.0           | 200.7          | 100                                |
| 5    | 0                                       | 118.3           | 253.9          | 100                                |
| 6    | 0                                       | 142.9           | 315.3          | 100                                |
| 7    | 0                                       | 165.4           | 358.4          | 100                                |
| 8    | 0                                       | 183.7           | 415.6          | 100                                |
| 9    | 0                                       | 206.3           | 454.7          | 100                                |
| 10   | 0                                       | 228.8           | 501.9          | 100                                |

Table S4. Photocatalytic activity of CO<sub>2</sub> reduction conversion over 4Au/2Mg-In<sub>2</sub>O<sub>3</sub>.

| Time | Rate of product (μmol/g/h) |                 |                | CH <sub>4</sub> selectivity (%) |
|------|----------------------------|-----------------|----------------|---------------------------------|
|      | CO                         | CH <sub>4</sub> | O <sub>2</sub> |                                 |
| 1    | 0                          | 24.5            | 51.2           | 100                             |
| 2    | 0                          | 25.2            | 51.4           | 100                             |
| 3    | 0                          | 25.4            | 51.8           | 100                             |
| 4    | 0                          | 24.3            | 50.9           | 100                             |
| 5    | 0                          | 25.2            | 52.1           | 100                             |
| 6    | 0                          | 24.1            | 51.7           | 100                             |
| 7    | 0                          | 23.9            | 51.3           | 100                             |
| 8    | 0                          | 25.4            | 50.6           | 100                             |
| 9    | 0                          | 25.3            | 50.9           | 100                             |
| 10   | 0                          | 24.3            | 51.5           | 100                             |
| 11   | 0                          | 24.1            | 51.9           | 100                             |
| 12   | 0                          | 24.9            | 50.9           | 100                             |
| 13   | 0                          | 23.8            | 51.7           | 100                             |
| 14   | 0                          | 25.7            | 51.4           | 100                             |
| 15   | 0                          | 25.2            | 52.5           | 100                             |
| 16   | 0                          | 25.1            | 50.7           | 100                             |
| 17   | 0                          | 24.6            | 50.1           | 100                             |
| 18   | 0                          | 23.7            | 50.9           | 100                             |
| 19   | 0                          | 24.3            | 51.5           | 100                             |
| 20   | 0                          | 24.1            | 51.6           | 100                             |

## References

- [S1] Y. Wang, J. Xu, J. Wan, J. Wang, L. Wang. *J. Colloid Interface Sci.* 2022, 616, 532-539.
- [S2] J. Li, F. Wei, C. Dong, W. Mu, X. Han. *J. Mater. Chem. A.* 2020, 8, 6524-6531.
- [S3] A. Zhou, C. Zhao, J. Zhou, Y. Dou, J. Li, M. Wei. *J. Mater. Chem. A.* 2023, 11, 12950-12957.
- [S4] Q. Xu, J. Jiang, X. Wang, L. Duan, H. Guo. *Rare Met.* 2023, 42, 1888-1898.
- [S5] X. Li, C. Fang, L. Huang, J. Yu. *J. Colloid Interface Sci.* 2024, 655, 485-492.
- [S6] Y. He, Z. Yang, J. Yu, D. Xu, C. Liu, Y. Pan, W. Macyk, F. Xu. *J. Mater. Chem. A.* 2023, 11, 14860-14869.
- [S7] Y. Wang, W. He, J. Xiong, Z. Tang, Y. Wei, X. Wang, H. Xu, X. Zhang, Z. Zhao, J. Liu. *Fuel.* 2023, 331, 125719.
